# Supplementary material for: The Cost-Effectiveness of Continuous Glucose Monitoring in Type 1 Diabetes
Source: PubMed Central journal article supplement — Diabetes Care. 2010 Mar 23;33(6):1269–74. doi: 10.2337/dc09-2042 (PMC2875436; doi:10.2337/dc09-2042), 2010-03-23
Supplement: supp_dc09-2042_onlineappendix.pdf [file supp_dc09-2042_onlineappendix.pdf]

## ONLINE APPENDIX

### “The Cost-Effectiveness of Continuous Glucose Monitoring in Type 1 Diabetes”

#### Writing Committee:

Lead authors:

Elbert S. Huang, M.D., M.P.H.

Michael J. O'Grady, Ph.D.

Anirban Basu, Ph.D.

Aaron Winn, M.P.P.

Priya John, M.P.H.

Joyce Lee, M.D., M.P.H.

David O. Meltzer, M.D., Ph.D.

#### Additional authors (alphabetical):

Craig Kollman, Ph.D.

Lori Laffel, M.D., M.P.H.

William V. Tamborlane, M.D.

Stuart A. Weinzier, M.D.

Tim Wysocki, Ph.D.

Dongyuan Xing, M.P.H.

#### Acknowledgements for editorial contributions to the manuscript:

Roy W. Beck, M.D., Ph.D.

Katrina J. Ruedy, M.S.P.H.

#### *The JDRF Continuous Glucose Monitoring Study Group*

*Clinical Centers:* Listed in order of number of patients enrolled with clinical center name, city, and state. Personnel are listed as (PI) for Principal Investigator, (I) for co-Investigator and (C) for Coordinators:

*Diabetes Care Center, University of Washington, Seattle, WA:* Irl B. Hirsch, M.D. (PI); Lisa K. Gilliam, M.D., Ph.D. (I); Kathy Fitzpatrick, R.N., M.N., C.D.E. (C); Dori Khakpour, R.D., C.D., C.D.E. (C); Department of Pediatrics,

*Yale University School of Medicine, New Haven, CT:* Stuart A. Weinzier, M.D. (PI); William V. Tamborlane, M.D. (I); Brett Ives, M.S.N., A.P.R.N. (C); Joan Bosson-Heenan (C);

*Adult Section, Joslin Diabetes Center, Boston, MA:* Howard Wolpert, M.D. (PI); Greeshma Shetty, M.D. (I); Astrid Atakov-Castillo (C); Judith Giusti, M.S., R.D., L.D.N., C.D.E. (C); Stacey O'Donnell, R.N., C.D.E. (C); Suzanne Ghiloni, R.N., C.D.E. (C);

*Atlanta Diabetes Associates, Atlanta, GA:* Bruce W. Bode, M.D. (PI); Kelli O'Neil, C.D.E. (C); Lisa Tolbert, R.N., M.N., C.D.E. (C);

*Nemours Children's Clinic, Jacksonville, FL:* Tim Wysocki, Ph.D. (co-PI); Larry A. Fox, M.D. (co-PI); Nelly Mauras, M.D. (I); Kimberly Englert, R.N. (C); Joe Permuy, M.S.N., A.R.N.P. (C);

*Division of Pediatric Endocrinology and Diabetes, Stanford University, Stanford, CA:* Bruce Buckingham, M.D. (PI); Darrell M. Wilson, M.D. (I); Jennifer Block, R.N., C.D.E. (C); Kari Benassi, R.N., N.P. (C);

*Department of Pediatrics, University of Iowa Carver College of Medicine, Iowa City, IA:* Eva Tsalikian, M.D. (PI); Michael Tansey, M.D. (I); Debra Kucera, A.R.N.P., C.P.N.P. (C); Julie Coffey, A.R.N.P., C.P.N.P. (C); Joanne Cabbage (C);

*Pediatric Adolescent, and Young Adult Section, Joslin Diabetes Center, Boston, MA:* Lori Laffel, M.D., M.P.H., (PI), Kerry Milaszewski, R.N., C.D.E. (C); Katherine Pratt (C); Elise Bismuth, M.D., M.S., (C); Joyce Keady, M.S.N., C.P.N.P. (C); Margie Lawlor, M.S., C.D.E. (C);

*Barbara Davis Center for Childhood Diabetes, University of Colorado, Denver, CO:* H. Peter Chase, M.D. (PI); Rosanna Fiallo-Scharer, M.D. (I); Paul Wadwa, M.D. (I); Laurel Messer, R.N., C.D.E. (C); Victoria Gage, R.N. (C); Patricia Burdick (C);

*Departments of Pediatric Endocrinology and Research and Evaluation, Kaiser Permanente, San Diego and Pasadena, CA:* Jean M. Lawrence, Sc.D., M.P.H., M.S.S.A. (co-PI); Robert Clemons, M.D. (co-PI); Michelle Maeve, R.N., C.D.E. (C); Bonnie Sattler, M.S., R.D. (C);  
*Coordinating Center:* Jaeb Center for Health Research, Tampa, FL: Roy W. Beck, M.D., Ph.D.; Katrina J. Ruedy, M.S.P.H.; Craig Kollman, Ph.D.; Dongyuan Xing, M.P.H.; Judy Jackson  
*University of Minnesota Central Laboratory:* Michael Steffes, M.D., Ph.D., Jean M. Bucksa, C.L.S., Maren L. Nowicki, C.L.S., Carol Van Hale, C.L.S., Vicky Makky, C.L.S.

**Cost-effectiveness investigators:**

*National Opinion Research Center, University of Chicago:* Michael O'Grady, Ph.D.; Elbert Huang, M.D., M.P.H.; Anirban Basu, Ph.D.; David O. Meltzer, M.D., Ph.D.; Lan Zhao. Ph.D.  
*University of Michigan:* Joyce Lee, M.D., M.P.H.

*Juvenile Diabetes Research Foundation, Inc.:* Aaron J. Kowalski, Ph.D.

*Operations Committee:* Lori Laffel, M.D., M.P.H. (co-chair), William V. Tamborlane, M.D. (co-chair), Roy W. Beck, M.D., Ph.D., Aaron J. Kowalski, Ph.D., Katrina J. Ruedy, M.S.P.H.

*Data and Safety Monitoring Board:* Ruth S. Weinstock, M.D., Ph.D. (chair), Barbara J Anderson, Ph.D.; Davida Kruger, M.S.N., A.P.R.N.; Lisa LaVange, Ph.D.; Henry Rodriguez, M.D.

The purpose of this technical appendix is to provide more detail for readers interested in understanding the structure and assumptions of the lifetime complication model for type 1 diabetes. The basic structure of the model is depicted in Figure 1 of the manuscript. For the purposes of this analysis, we simulate the lifetime of cohorts of subjects assigned to CGM or traditional self-monitoring of blood glucose. All simulated subjects run through eight disease modules and a mortality module at one year cycles. Simulated patients can experience multiple disease states and continue to cycle through the model till death occurs.

The microvascular complication modules include retinopathy, nephropathy, and neuropathy. The retinopathy module follows patients across transitions from normal vision, to background diabetic retinopathy, to intermediate states (proliferative diabetic retinopathy and macular edema), and to blindness. Patients can become blind from proliferative diabetic retinopathy and from macular edema. The neuropathy module follows patients across transitions from normal peripheral nerves, to neuropathy, to foot ulcers, to amputation. The nephropathy module follows patients across transitions from normal renal function, to microalbuminuria, to proteinuria, to end-stage renal disease requiring dialysis.

For all microvascular complications, we used the original DCCT prediction models for intermediate complications that relate HbA<sub>1c</sub> with the cumulative probability of developing these intermediate complications (courtesy Richard Eastman).(1; 2) Because of the similarities in the distributions of baseline HbA<sub>1c</sub> levels in the trial populations to that of the intensive arm of DCCT, we used the equations developed for the intensive arm of DCCT. The disease free survival formulas from DCCT have the following functional form

$$\text{Disease Free Survival} = \text{Exp}(-\text{Exp}(B_0) * ((\text{HbA}_{1c})^{B_1}) * ((\text{Duration of diabetes})^{A_1}))$$

For the transitions from intermediate to end-stage microvascular complications, we used annual probabilities found in the literature.(3-8)

All probabilities for macrovascular complications come from the United Kingdom Prospective Diabetes Study (UKPDS No.68). The modules for ischemic heart disease, myocardial infarction, and stroke are all single complication equations with no intermediary transition states.

The complication states that were assigned utilities for this analysis included blindness, end-stage renal disease, foot ulcer, lower extremity amputation, myocardial infarction or arrest, angina (Ischemic heart disease), and stroke. We used the average utilities for these states obtained from trial subjects. The myocardial infarction utility comes from the utility for angina. We applied the same average complication utility to control and intervention patients. Quality adjusted life years (QALYs) were calculated using the minimum method. In this method, the lowest utility score for any experienced health state (treatment or complication state) is used for a given year. For example, if a patient experienced a myocardial infarction and a stroke in a given year while using CGM, the utility for that year would be 0.36 which is the lower utility of the three states. If a patient had no complications in a given year the patient receives an everyday utility for life with CGM or SMBG. The total QALY for a given patient is the sum of each year's QALY for the patient's lifetime.

**Appendix Table 1. Within-Trial Cost Assumptions**

| <b>Within Trial Cost Assumptions</b>                                                                            |                                                                 |                                                                                                                                                     |
|-----------------------------------------------------------------------------------------------------------------|-----------------------------------------------------------------|-----------------------------------------------------------------------------------------------------------------------------------------------------|
| <b>Item</b>                                                                                                     | <b>Unit Cost</b>                                                | <b>Source</b>                                                                                                                                       |
| <b>Direct CGM Personnel Costs</b>                                                                               |                                                                 |                                                                                                                                                     |
| Time of investigators/coordinators devoted to training/counseling patient on RT-CGM (sum of time over 6 months) | \$51.30/hour (\$64/hour for pediatrician, \$30/hour for nurse)  | Bureau of Labor Statistics<br><a href="http://www.bls.gov/oes/current/oes_nat.htm#b31-0000">http://www.bls.gov/oes/current/oes_nat.htm#b31-0000</a> |
| <b>Direct Medical Care Costs</b>                                                                                |                                                                 |                                                                                                                                                     |
| Pump user (infusion set, meter control solution, glucagon)                                                      | \$1371/year                                                     | See Appendix Table 3                                                                                                                                |
| MDI user (syringes, meter control solution, glucagon)                                                           | \$419/year                                                      | See Appendix Table 3                                                                                                                                |
| Average daily insulin use over 6 months                                                                         | \$0.09/unit of insulin                                          | \$91.88/1000 units Lantus Red Book 2007                                                                                                             |
| Average daily fingerstick use over 6 months                                                                     | \$0.23/lancet (assume 6 used during trial)<br>\$0.92/test strip | \$46.69/200 lancets<br>\$46.12/50 test strips<br>Red Book 2007                                                                                      |
| Daily RT-CGM sensor costs                                                                                       | \$13.85/day                                                     | See Appendix Table 2                                                                                                                                |
| Number of office visits (6 months)                                                                              | \$331                                                           | Diabetes Care 2008;31:596-615(9)                                                                                                                    |
| Number of ER visits (6 month)                                                                                   | \$696                                                           | Diabetes Care 2008;31:596-615(9)                                                                                                                    |
| Number of 911 calls (6 month)                                                                                   | \$415 (\$381-\$450)                                             | <i>Ambulance Providers: Costs and Expected Medicare Margins Vary Greatly.</i> <a href="#">GAO-07-383</a> . Washington, D.C.: May 2007.              |
| Number of hospitalizations (6 month)                                                                            | \$4897/hospitalization                                          | <a href="http://www.cms.hhs.gov/HealthCareConInit/02_Hospital.asp#TopOfPage">http://www.cms.hhs.gov/HealthCareConInit/02_Hospital.asp#TopOfPage</a> |
| Number of after hour visits (6 month)                                                                           | \$331                                                           | Diabetes Care 2008;31:596-615(9)                                                                                                                    |
| <b>Indirect Costs</b>                                                                                           |                                                                 |                                                                                                                                                     |
| Hours per day devoted to diabetes care-patient (6 months)                                                       | Age and sex specific median hourly wage                         | Bureau of Labor Statistics 2007                                                                                                                     |
| Days of work/school missed due to diabetes- patient* (6 months)                                                 | Age and sex specific median hourly wage                         | Bureau of Labor Statistics 2007                                                                                                                     |
| Hours per day devoted to diabetes care-primary caregiver (6 months)                                             | Age and sex specific median hourly wage                         | Bureau of Labor Statistics 2007                                                                                                                     |
| Days of work/school missed due to diabetes*- primary caregiver months)                                          | Age and sex specific median hourly wage                         | Bureau of Labor Statistics 2007                                                                                                                     |
| Hours per day devoted to diabetes care-secondary caregiver (6 months))                                          | Age and sex specific median hourly wage                         | Bureau of Labor Statistics 2007                                                                                                                     |
| Days of work/school missed due to diabetes*- secondary caregiver (6 months))                                    | Age and sex specific median hourly wage                         | Bureau of Labor Statistics 2007                                                                                                                     |

\* Includes whole days missed and days of underperformance where 50% of a day is lost.

**Appendix Table 2. Optimal Protocol Continuous Glucose Monitoring Cost Assumptions**

|                                           | <b>Medtronic</b>       | <b>Abbott</b>              | <b>Dexcom</b>        | <b>Average daily CGM cost</b> |
|-------------------------------------------|------------------------|----------------------------|----------------------|-------------------------------|
|                                           | <b>Guardian</b>        | <b>Freestyle Navigator</b> | <b>Seven</b>         |                               |
| Initial Kit                               | \$1,339 with 4 sensors | \$1,250 with 0 sensors     | \$600 with 0 sensors |                               |
| Sensors                                   | \$350 for Box of 10    | \$450 for Box of 6         | \$240 for Box of 4   |                               |
| FDA approved sensor replacement frequency | 3 days                 | 5 days                     | 7 days               |                               |
| Daily Sensor Cost                         | \$11.67                | \$15.00                    | \$8.57               |                               |
| Transmitter Cost                          | \$550                  | --                         | \$400                |                               |
| Transmitter Lifespan                      | 1 year                 | 2 years                    | 1.5 years            |                               |
| Transmitter Daily Cost                    | \$1.51                 | --                         | \$0.80               |                               |
| Receiver Cost                             | 0                      | --                         | \$600                |                               |
| Receiver Lifespan                         | 4 years                | 2 years                    | 1.25 years           |                               |
| Receiver Daily Cost                       | 0                      | --                         | \$1.32               |                               |
|                                           |                        |                            |                      |                               |
| Year 1 Daily Cost                         | \$14.95                | \$16.71                    | \$9.89               | \$13.85                       |
| Year 2 Daily Cost                         | \$13.18                | \$16.71                    | \$10.11              | \$13.33                       |
| Year 3 Daily Cost                         | \$13.18                | \$16.71                    | \$10.62              | \$13.50                       |

\* CGM= continuous glucose monitoring; FDA= Food and Drug Administration

**Appendix Table 3. Long-term cost-effectiveness analysis base case model assumptions**

| Definition                                                                                                 | Base-Case Value (Range)                                                                                                   |                                    | References                                    |
|------------------------------------------------------------------------------------------------------------|---------------------------------------------------------------------------------------------------------------------------|------------------------------------|-----------------------------------------------|
| Demographics and clinical characteristics                                                                  |                                                                                                                           |                                    |                                               |
| Age                                                                                                        | HbA <sub>1c</sub> ≥7.0% cohort (43 (SD 12, Min 25, Max 73),<br>HbA <sub>1c</sub> <7.0% cohort (31 (SD 17, Min 8, Max 65)) |                                    | Study population                              |
| Proportion women                                                                                           | HbA <sub>1c</sub> ≥7.0% cohort (56%),<br>HbA <sub>1c</sub> <7.0% cohort (53%)                                             |                                    | Study population                              |
| Duration of diabetes                                                                                       | Age and gender specific duration of diabetes for both cohorts                                                             |                                    | Study population                              |
| Blood pressure                                                                                             | Non-diabetic values                                                                                                       |                                    | NHANES                                        |
| Cholesterol                                                                                                | Non-diabetic values                                                                                                       |                                    | NHANES ; Wadwa 2005(10)                       |
| Body mass index                                                                                            | Age-gender based values                                                                                                   |                                    | Study population                              |
| Smoking                                                                                                    | Age-gender based values                                                                                                   |                                    | Study Population                              |
| Impact of RT-CGM                                                                                           |                                                                                                                           |                                    |                                               |
|                                                                                                            | Control                                                                                                                   | RT-CGM                             |                                               |
| Glycosylated hemoglobin distributions, HbA <sub>1c</sub> ≥7.0% cohorts                                     | Mean 7.6, SD 0.4, Min 6.7, Max 8.7                                                                                        | Mean 7.1, SD 0.4, Min 6.2, Max 8.8 | Study adjusted results                        |
| Glycosylated hemoglobin distributions, HbA <sub>1c</sub> <7.0% cohorts                                     | Mean 6.8, SD 0.5, Min 5.8, 8.1                                                                                            | Mean 6.5, SD 0.5, Min 5.3, Max 7.7 | Study adjusted results                        |
| Immediate quality of life (utility) distributions at end of 6 month trial, HbA <sub>1c</sub> ≥7.0% cohorts | Mean 0.8338, Variance 0.0005                                                                                              | Mean 0.8608, Variance 0.0017       | Study adjusted results                        |
| Immediate quality of life (utility) distributions at end of 6 month trial, HbA <sub>1c</sub> <7.0% cohorts | Mean 0.8400, Variance 0.0006                                                                                              | Mean 0.8935, Variance 0.0010       | Study adjusted results                        |
| Annual probability of diabetic retinopathy progression                                                     |                                                                                                                           |                                    |                                               |
| No retinopathy to background diabetic retinopathy (BDR)                                                    | DCCT equation intensive glucose arm                                                                                       |                                    | Eastman 1997(1)                               |
| BDR to Macular edema                                                                                       | DCCT equation intensive glucose arm                                                                                       |                                    | Eastman 1997(1)                               |
| BDR to Proliferative diabetic retinopathy (PDR)                                                            | DCCT equation intensive glucose arm                                                                                       |                                    | Eastman 1997(1)                               |
| Macular edema to blindness with photocoagulation                                                           | 0.0300                                                                                                                    |                                    | Javitt 1994(3), Vijan 2000(4), ETDRS 1991(11) |
| PDR to blindness with photocoagulation                                                                     | 0.0148                                                                                                                    |                                    | Javitt 1994(3), Vijan 2000(4), ETDRS 1991(11) |
| Annual probability of diabetic nephropathy progression                                                     |                                                                                                                           |                                    |                                               |
| Microalbuminuria                                                                                           | DCCT equation intensive glucose arm                                                                                       |                                    | Eastman 1997(1)                               |
| Microalbuminuria to Gross proteinuria                                                                      | DCCT equation intensive glucose arm multiplied by 3 to obtain conditional probability                                     |                                    | Eastman 1997(1), UKPDS 64(12)                 |
| Gross proteinuria to end-stage renal disease                                                               | 0.0042 (0-11 years)<br>0.0385 (12-24 years)<br>0.0740 (25 years-).                                                        |                                    | Humphrey 1989(5)                              |
| Annual probability of diabetic neuropathy progression                                                      |                                                                                                                           |                                    |                                               |
| Diabetic neuropathy                                                                                        | UKPDS control arm- DCCT equation                                                                                          |                                    | Eastman 1997(1)                               |
| Neuropathy to foot ulcer                                                                                   | 0.0075, without neuropathy<br>0.0435, with neuropathy                                                                     |                                    | Young 1994(6), Gregg 2004(7)                  |
| Foot ulcer to amputation                                                                                   | 0, no risk factors                                                                                                        |                                    | Peters 2001(8)                                |

|                                                    |                                                                                                                          |                                                      |
|----------------------------------------------------|--------------------------------------------------------------------------------------------------------------------------|------------------------------------------------------|
|                                                    | 0, neuropathy<br>0.0067, neuropathy with foot deformity<br>0.0697, history of foot ulcer                                 |                                                      |
| Annual probability of cardiovascular complications |                                                                                                                          |                                                      |
| Ischemic heart disease                             | UKPDS equation                                                                                                           | Clarke 2004(13)                                      |
| Congestive heart failure                           | UKPDS equation                                                                                                           | Clarke 2004(13)                                      |
| Myocardial infarction                              | UKPDS equation                                                                                                           | Clarke 2004(13)                                      |
| Stroke                                             | UKPDS equation                                                                                                           | Clarke 2004(13)                                      |
| Annual probability of major hypoglycemic event     |                                                                                                                          |                                                      |
| Hypoglycemia requiring medical care                | 0.26                                                                                                                     | Study population                                     |
| Annual probability of death                        |                                                                                                                          |                                                      |
| First event mortality                              | UKPDS equation                                                                                                           | Clarke 2004(13)                                      |
| Diabetes mortality                                 | UKPDS equation                                                                                                           | Clarke 2004(13)                                      |
| Background mortality                               | National Vital Statistics Life Tables ((non-cardiovascular death rate for non-diabetics)*2.75)                           | CDC, National Center for Health Statistics, 2004(14) |
| Other assumptions                                  |                                                                                                                          |                                                      |
| Prevalence of foot deformity                       | 0.37 (0.30-0.45)                                                                                                         | Rith-Najarian 1992(15)                               |
| Prevalence of atrial fibrillation                  | Gender and age specific prevalence from Kaiser population                                                                | Go 2001(16)                                          |
| Costs, \$                                          |                                                                                                                          |                                                      |
| RT-CGM costs                                       |                                                                                                                          |                                                      |
| CGM training costs (Physician and nurse educator)  | 246 (51-512) (5 hours (1-10) hours: 30% time of physician (64/hour), 100% time of nurse (30/hour))                       | Study results                                        |
| Daily CGM costs                                    | 13.85 (year 1), 13.33 (year 2), 13.50 (year 3) for intervention group                                                    | See Appendix Table 2                                 |
| Days of CGM use per year                           | 313 (6/7 days per week) for intervention group                                                                           | See Appendix Table 2                                 |
| Glucometer costs                                   |                                                                                                                          |                                                      |
| Lancets                                            | 0.23/lancet                                                                                                              | Redbook 2008                                         |
| Lancets use per year                               | 12                                                                                                                       |                                                      |
| Test strips                                        | 0.92/strip                                                                                                               | Redbook 2008                                         |
| Test strips use per year                           | HbA <sub>1c</sub> ≥7.0% cohort (2,190 control; 2,008 intervention); HbA <sub>1c</sub> <7.0% cohort (2,555 for both arms) | Study adjusted results                               |
| Pump and syringe costs                             |                                                                                                                          |                                                      |
| Pump costs                                         | 1,371/year                                                                                                               | Study population                                     |
| Proportion using pumps, %                          | HbA <sub>1c</sub> ≥7.0% cohort (84), HbA <sub>1c</sub> <7.0% cohort (86)                                                 | Study population                                     |
| Multiple daily injections, syringe cost            | 0.26/needle/syringe                                                                                                      | Redbook 2008                                         |
| Syringe utilization                                | 4 syringes/day                                                                                                           |                                                      |
|                                                    |                                                                                                                          |                                                      |
| Routine laboratory testing                         |                                                                                                                          |                                                      |
| Glycosylated hemoglobin                            | 13.56 (11.50-15.00)                                                                                                      | 2004 Medicare fee schedule                           |
| Lipid panel                                        | 18.19 (17.00-19.50)                                                                                                      |                                                      |
| Urine microalbuminuria                             | 6.27 (5.00-7.50)                                                                                                         |                                                      |
| Drugs costs                                        |                                                                                                                          |                                                      |

|                                                |                                                                                                                       |                                     |
|------------------------------------------------|-----------------------------------------------------------------------------------------------------------------------|-------------------------------------|
| Insulin                                        | \$91.88/1,000 units                                                                                                   | Redbook 2008                        |
| Insulin use                                    | HbA <sub>1c</sub> ≥7.0% cohort (46 units/day), HbA <sub>1c</sub> <7.0% cohort (43 units/day)                          |                                     |
| <b>Eye related costs</b>                       |                                                                                                                       |                                     |
| Macular edema                                  | 916 (event), 90 (state)                                                                                               | O'Brien 2003(17)                    |
| Proliferative diabetic retinopathy             | 1,013 (event), 90 (state)                                                                                             |                                     |
| Blindness                                      | 4,438                                                                                                                 |                                     |
| <b>Kidney related costs</b>                    |                                                                                                                       |                                     |
| Microalbuminuria                               | 76 (event), 18 (state)                                                                                                | O'Brien 2003(17)                    |
| Proteinuria                                    | 81 (event), 26 (state)                                                                                                |                                     |
| ESRD                                           | 44,577                                                                                                                |                                     |
| <b>Neuropathy related costs</b>                |                                                                                                                       |                                     |
| Neuropathy                                     | 448                                                                                                                   | O'Brien 2003(17)                    |
| Foot ulcer care                                | 9,501 (8,501-10,501)                                                                                                  | Diabetes in America(18)             |
| Lower extremity amputation                     | 36,548 (event), 1,314 (state)                                                                                         | O'Brien 2003(17)                    |
| <b>Cardiovascular complication costs</b>       |                                                                                                                       |                                     |
| Acute myocardial infarction                    | 36,560 (event), 2,020 (state)                                                                                         | O'Brien 2003(17)                    |
| Angina                                         | 7,253 (event), 1,874 (state)                                                                                          |                                     |
| Ischemic stroke                                | 48,414 (event), 16,157 (state)                                                                                        |                                     |
| <b>Hypoglycemia costs</b>                      |                                                                                                                       |                                     |
| Hypoglycemic event requiring medical attention | 1,087                                                                                                                 | Bullano 2008(19)                    |
| <b>Indirect costs</b>                          |                                                                                                                       |                                     |
| Patient and caregiver time                     | Age and sex specific median hourly wage                                                                               | Bureau of Labor Statistics 2007     |
| <b>Utilities</b>                               |                                                                                                                       |                                     |
| Quality of life at end of trial                | HbA <sub>1c</sub> ≥7.0% cohort (0.86 intervention and control arm); HbA <sub>1c</sub> <7.0% cohort (0.84 control arm) | Subject response-overall cohort     |
| Blindness                                      | 0.55                                                                                                                  | Subject response-overall cohort     |
| End-stage renal disease                        | 0.51                                                                                                                  | Subject response-overall cohort     |
| Foot ulcer                                     | 0.75                                                                                                                  | Redekop 2004(20), Tennvall 2001(21) |
| Lower extremity amputation                     | 0.74                                                                                                                  | Subject response-overall cohort     |
| Myocardial infarction or arrest                | 0.75                                                                                                                  | Subject response-overall cohort     |
| Angina (Ischemic heart disease)                | 0.75                                                                                                                  | Subject response-overall cohort     |
| Stroke                                         | 0.36                                                                                                                  | Subject response-overall cohort     |
| <b>Discount Rate, %</b>                        | 3 (3-5)                                                                                                               |                                     |

**Appendix Figure 1. Model of Diabetes-Related Complications.**

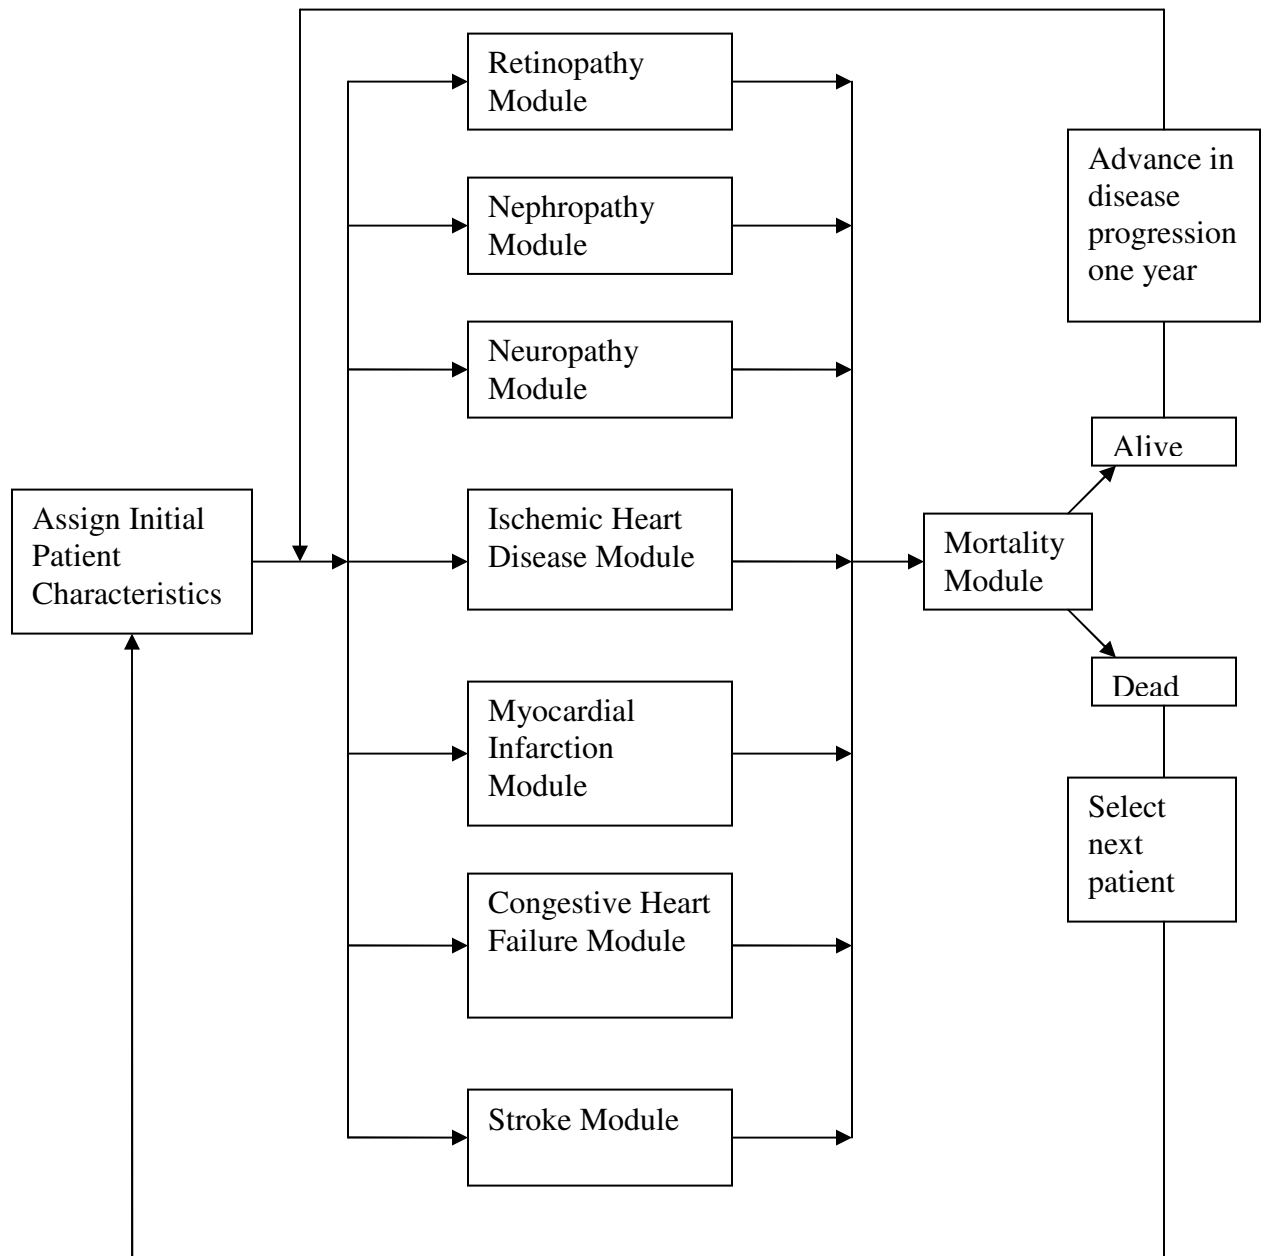

**Appendix Figure 2. One-way sensitivity analyses for lifetime analysis**

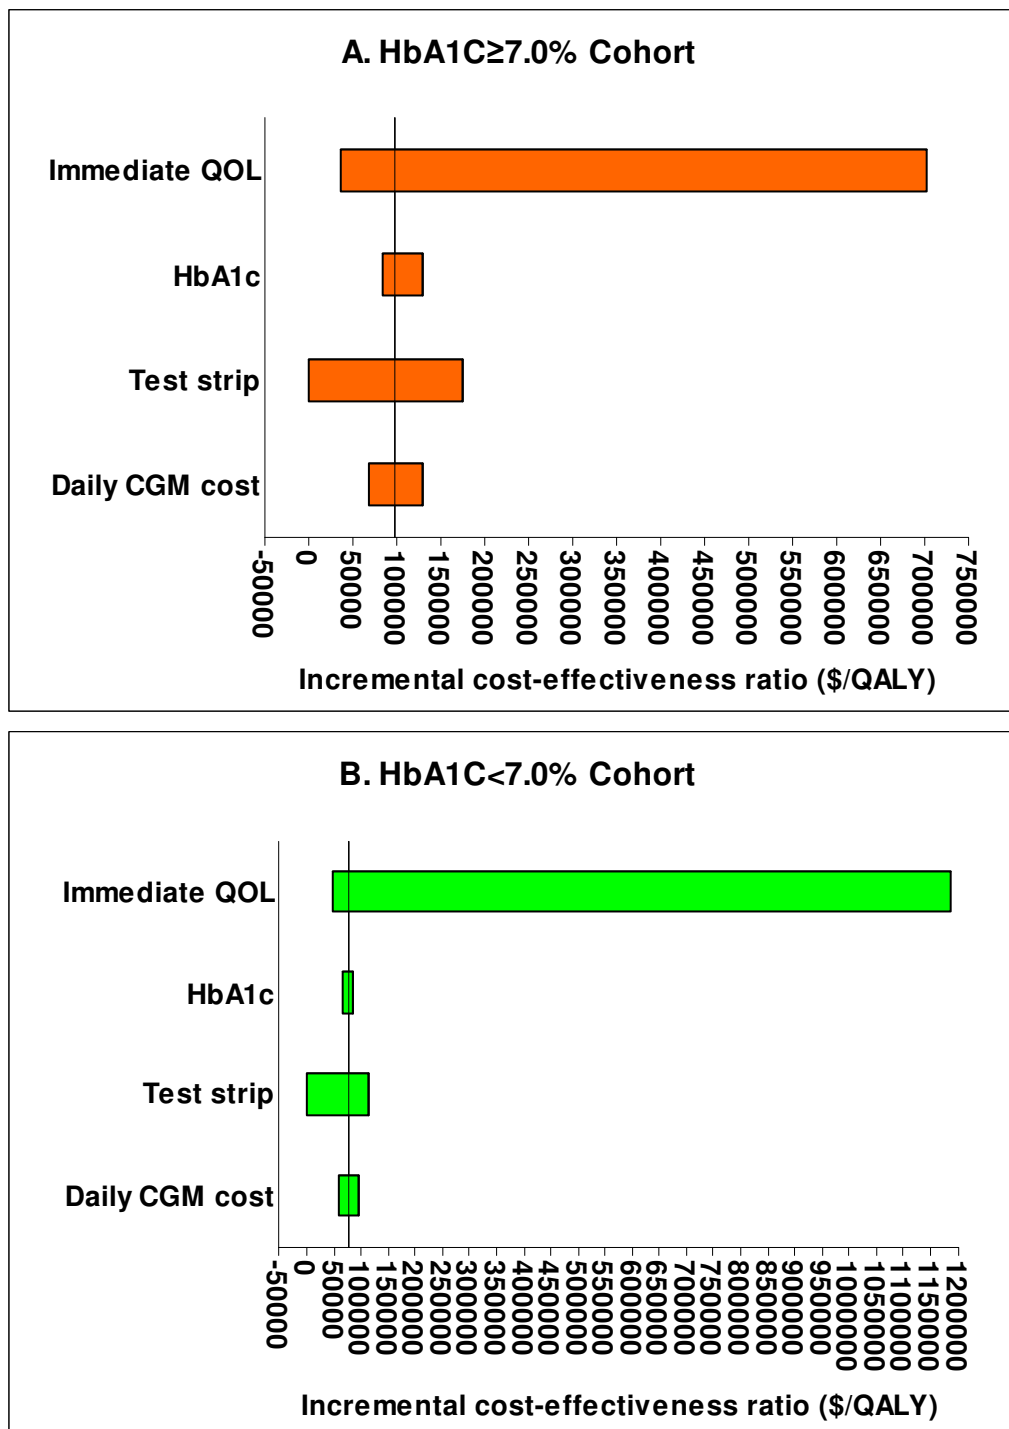

Immediate quality of life (QOL) effect range: 0.1 improvement in utility to no improvement in utility. HbA1c difference range: 1% difference to no difference. Test strip range: 2 test strips per day with continuous glucose monitor (CGM) to 10 test strips per day. Daily CGM cost range: \$9.89/day to \$16.71/day. QALY = quality-adjusted life year.

**Appendix Figure 3. Baseline Time Tradeoff Utilities for A1C<7.0 Cohort Subjects Randomized to the Continuous Glucose Monitor**

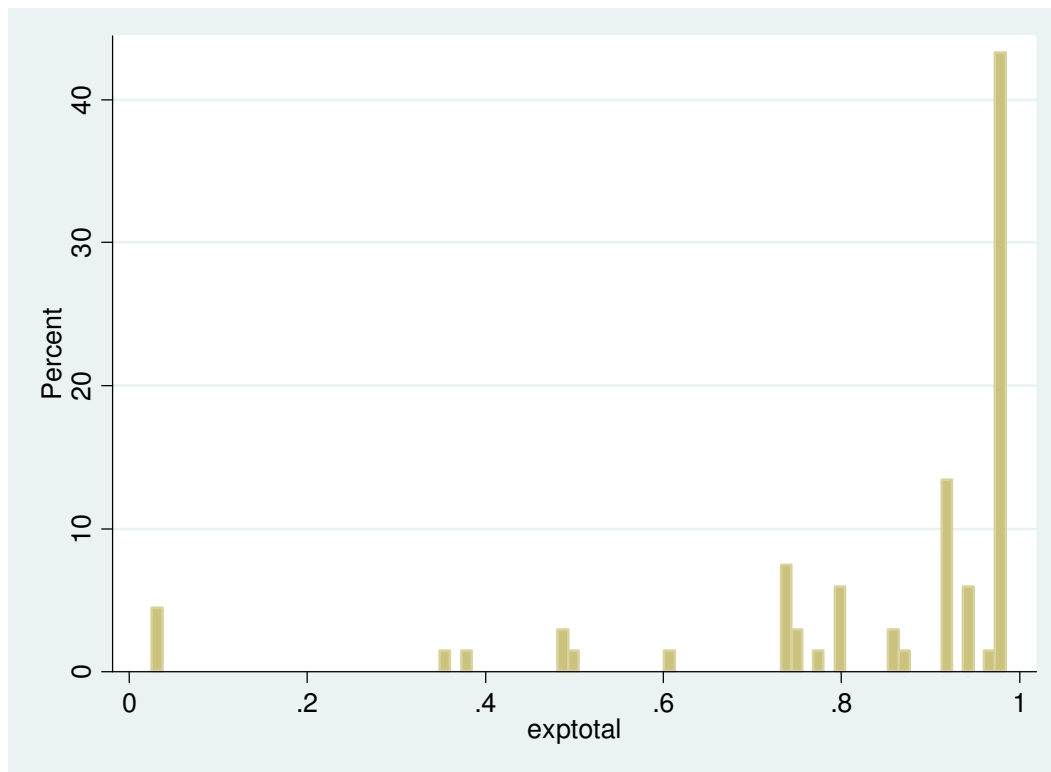

This figure displays the distribution of baseline experienced time-tradeoff utilities for patients in the treatment group of the A1C<7.0 cohort. The y-axis is the proportion of individuals within utility categories and the x-axis displays the utility on a 0 to 1 scale.

## REFERENCES

1. Eastman RC, Javitt JC, Herman WH, Dasbach EJ, Zbrozek AS, Dong F, Manninen D, Garfield SA, Copley-Merriman C, Maier W, Eastman JF, Kotsanos J, Cowie CC, Harris M: Model of complications of NIDDM. I. Model construction and assumptions. *Diabetes Care* 20:725-734, 1997
2. Eastman RC, Javitt JC, Herman WH, Dasbach EJ, Copley-Merriman C, Maier W, Dong F, Manninen D, Zbrozek AS, Kotsanos J, Garfield SA, Harris M: Model of complications of NIDDM. II. Analysis of the health benefits and cost-effectiveness of treating NIDDM with the goal of normoglycemia. *Diabetes Care* 20:735-744, 1997
3. Javitt JC, Aiello LP, Chiang Y, Ferris FL, Canner JK, Greenfield S: Preventive eye care in people with diabetes is cost-saving to the federal government. *Diabetes Care* 17:909-917, 1994
4. Vijan S, Hofer TP, Hayward RA: Cost-utility analysis of screening intervals for diabetic retinopathy in patients with type 2 diabetes mellitus. *Journal of the American Medical Association* 283:889-896, 2000
5. Humphrey LL, Ballard DJ, Frohnert PP, Chu CP, O'Fallon WM, Palumbo PJ: Chronic renal failure in non-insulin-dependent diabetes mellitus. A population-based study in Rochester, Minnesota. *Annals of Internal Medicine* 111:788-796, 1989
6. Young MJ, Breddy JL, Veves A, Boulton AJM: The prediction of diabetic neuropathic foot ulceration using vibration perception thresholds. *Diabetes Care* 17:557-560, 1994
7. Gregg EW, Sorlie P, Paulose-Ram R, Gu Q, Eberhardt MS, Wolz M, Burt V, Curtin L, Engelgau M, Geiss L: Prevalence of lower-extremity disease in the U.S. adult population  $\geq 40$  years of age with and without diabetes. *Diabetes Care* 27:1591-1597, 2004
8. Peters EJG, Lavery LA: Effectiveness of the diabetic foot risk classification system of the international working group on the diabetic foot. *Diabetes Care* 24:1442-1447, 2001
9. Economic costs of diabetes in the U.S. in 2007. *Diabetes Care* 31:596-615, 2008
10. Wadwa RP, Kinney GL, Maahs DM, Snell-Bergeon J, Hokanson JE, Garg SK, Eckel RH, Rewers M: Awareness and treatment of dyslipidemia in young adults with type 1 diabetes. *Diabetes Care* 28:1051-1056, 2005
11. Early Treatment Diabetic Retinopathy Study Research Group: Early photocoagulation for diabetic retinopathy: ETDRS Report Number 9. *Ophthalmology* 98:766-785, 1991
12. Adler AI, Stevens RJ, Manley SE, Bilous RW, Cull CA, Holman RR, on behalf of the UKPDS Group: Development and progression of nephropathy in type 2 diabetes: The United Kingdom Prospective Diabetes Study (UKPDS 64). *Kidney International* 63:225-232, 2003
13. Clarke PM, Gray AM, Briggs A, Farmer AJ, Fenn P, Stevens RJ, Matthews DR, Stratton IM, Holman RR: A model to estimate the lifetime health outcomes of patients with type 2 diabetes: the United Kingdom Prospective Diabetes Study (UKPDS) Outcomes Model (UKPDS no. 68). *Diabetologia* 47:1747-1759, 2004
14. Centers for Disease Control, National Center for Health Statistics: Compressed Mortality File 1999-2005.
15. Rith-Najarian SJ, Stolusky T, Gohdes DM: Identifying diabetic patients at high risk for lower-extremity amputation in a primary health care setting. *Diabetes Care* 15:1386-1389, 1992
16. Go AS, Hylek EM, Phillips KA, Chang YC, Henault LE, Selby JV, Singer DE: Prevalence of diagnosed atrial fibrillation in adults: national implications for rhythm management and stroke prevention: the AnTicoagulation and Risk Factors in Atrial Fibrillation (ATRIA) Study. *Journal of the American Medical Association* 285:2370-2375, 2001
17. O'Brien JA, Patrick AR, Caro J: Estimates of direct medical costs for microvascular and macrovascular complications resulting from type 2 diabetes mellitus in the United States in 2000. *Clin Ther* 25:1017-1038, 2003

18. Palumbo PJ, Melton LJ: Peripheral vascular disease and diabetes. In *Diabetes in America*, 2nd ed. Harris MI, Ed. Bethesda, MD, National Institutes of Health, 1995, p. 401-428
19. Bullano MF, Al-Zakwani IS, Fisher MD, Menditto L, Willey VJ: Differences in hypoglycemia event rates and associated cost-consequence in patients initiated on long-acting and intermediate-acting insulin products. *Curr Med Res Opin* 21:291-298, 2005
20. Redekop WK, Stolk EA, Kok E, Lovas K, Kalo Z, Busschbach JJ: Diabetic foot ulcers and amputations: estimates of health utility for use in cost-effectiveness analyses of new treatments. *Diabetes Medicine* 30:549-556, 2004
21. Tennvall GR, Apelqvist J: Prevention of diabetes-related foot ulcers and amputations: a cost-utility analysis based on Markov model simulations. *Diabetologia* 44:2077-2087, 2001
